# Supplementary material for: Dual but not single PD-1 or TIM-3 blockade enhances oncolytic virotherapy in refractory lung cancer
Source: PubMed Central journal article supplement — J Immunother Cancer. 2020 May 26;8(1):e000294. doi: 10.1136/jitc-2019-000294 (PMC7254155; doi:10.1136/jitc-2019-000294), 2020-05-26
Supplement: jitc-2019-000294supp001.pdf [file jitc-2019-000294supp001.pdf]

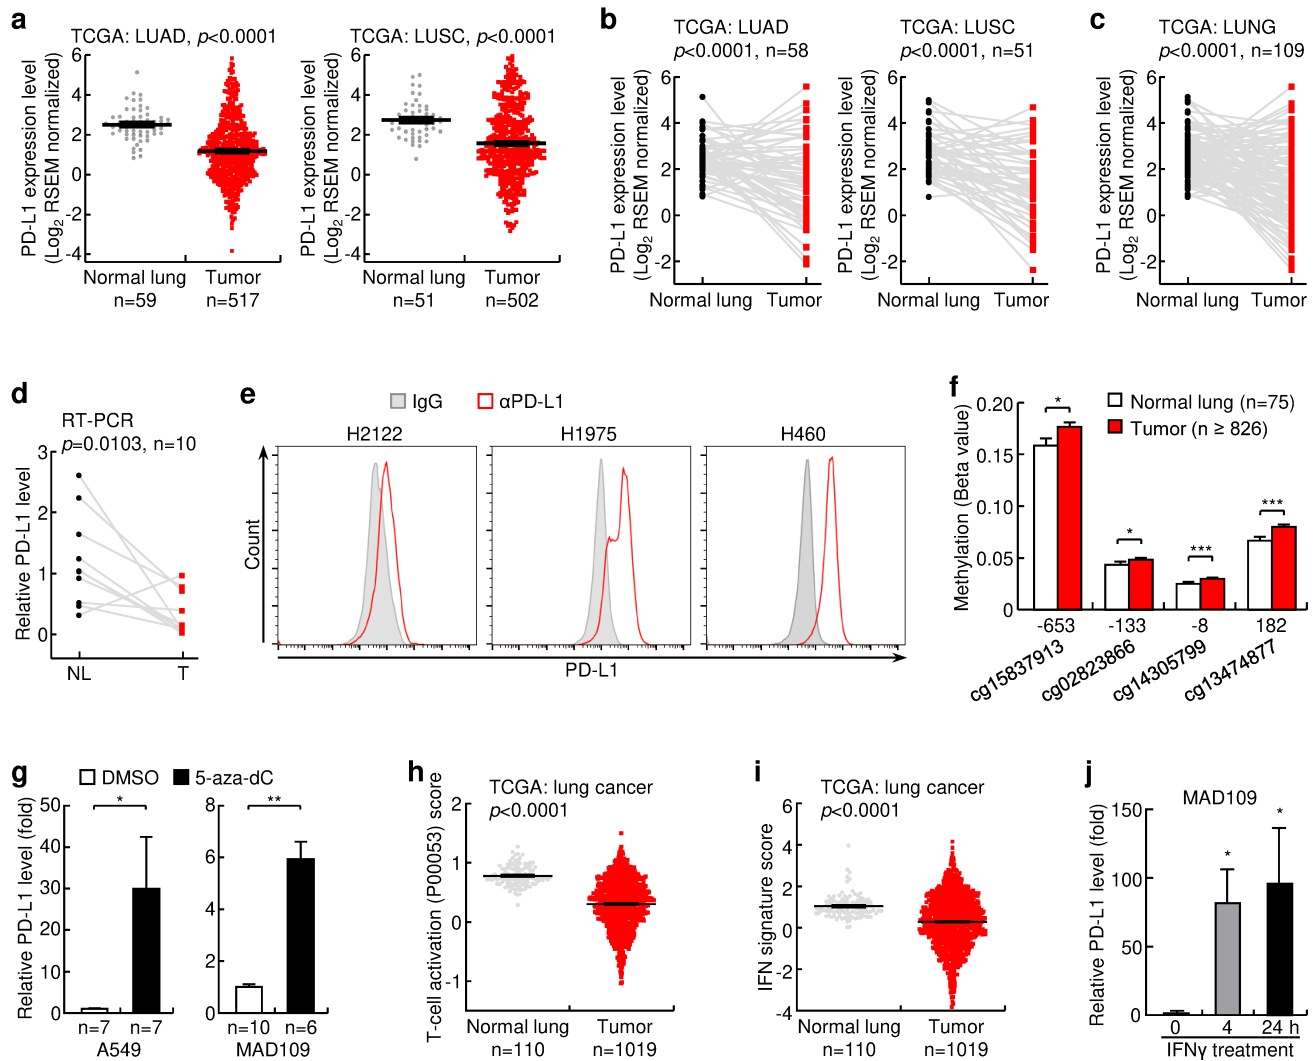

**Supplementary Fig. S1** PD-L1 is downregulated in the majority of human lung cancers and PD-L1 downregulation in lung cancer involves its promoter methylation and inflammation repression. **a** TCGA data showing PD-L1 downregulation in human lung adenocarcinoma (LUAD) and squamous cell carcinoma (LUSC), two most common types of lung cancer that account for about 40% and 30% of all lung cancers, respectively. Grey dots and red dots stand for normal lung tissues and lung tumor tissues, respectively. **b** and **c** TCGA data showing PD-L1 downregulation in human lung cancers using paired lung tumor tissues and adjacent normal tissues from the same patients. **d** qPCR analysis showing PD-L1 downregulation in human lung cancers using paired lung tumor tissues (T) and adjacent normal lung tissues (NL) from the same patients. Student's *t* test (two tailed, paired) was performed in (**b-d**). **e** FACS analysis showing low PD-L1 expression on H2122 but high on H1975 or H460 human lung cancer cell lines. **f** TCGA data showing increased CpG methylation of the *pd-1* promoter in human lung cancer. The position of CpG nucleotides relative to the *pd-1* transcription initiation site (+1) and their probes are indicated at the bottom. **g** qPCR showing demethylating agent 5-aza-dC (0.5  $\mu$ M) induction of PD-L1 expression in A549 (5 days) and MAD109 (3 days) lung cancer cells. **h** and **i** TCGA data showing decreased T-cell activation and IFN signature gene expression in human lung cancer. **j** qPCR showing IFN $\gamma$  (20 ng/ml) induction of PD-L1 expression in MAD109 lung cancer cells (n = 5 for 0 and 4 h, n = 4 for 24 h).

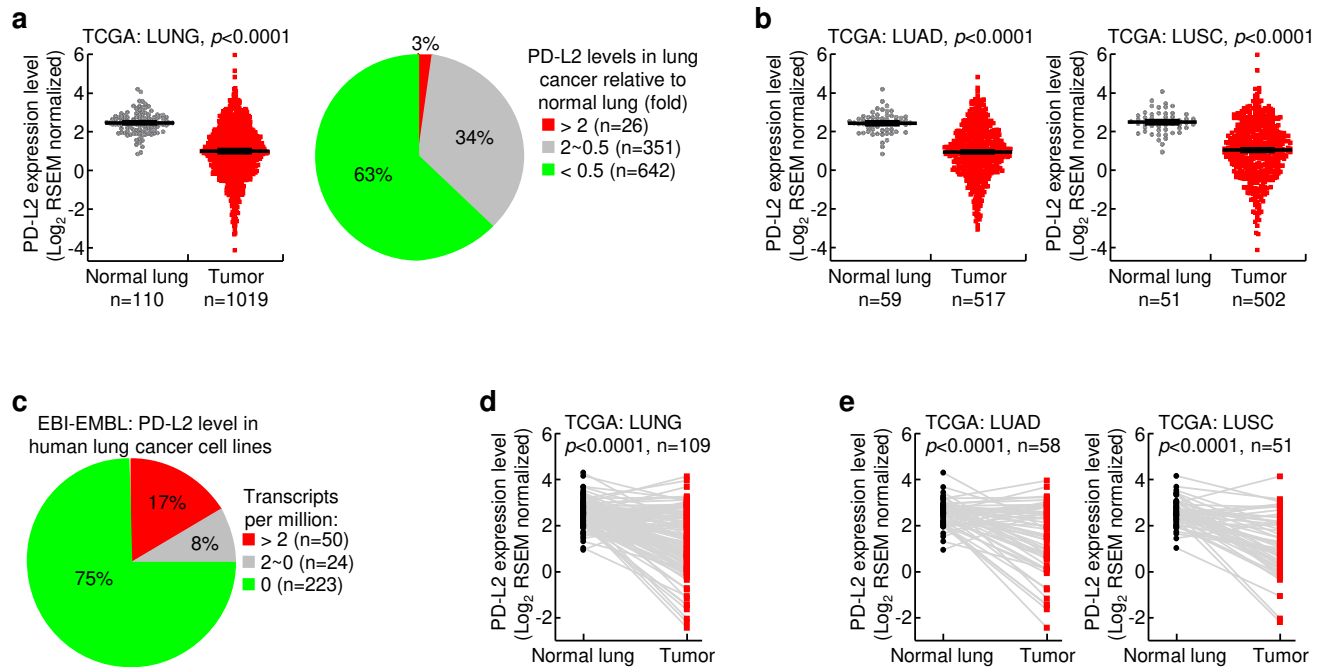

**Supplementary Fig. S2** PD-L2 is downregulated in the majority of human lung cancers. **a** TCGA data showing PD-L2 downregulation in human lung cancer. Left: grey dots and red dots stand for normal lung tissues and lung cancer tissues, respectively. Right: PD-L2 expression profile in lung cancer tissues. Sample numbers are indicated. **b** TCGA data showing PD-L2 downregulation in human LUAD and LUSC subtypes. **c** EMBL-EBI data showing PD-L2 downregulation in human lung cancer cell lines. **d** and **e** TCGA data showing PD-L1 downregulation in human lung cancers using paired lung cancer tissues and adjacent normal tissues from the same patients.

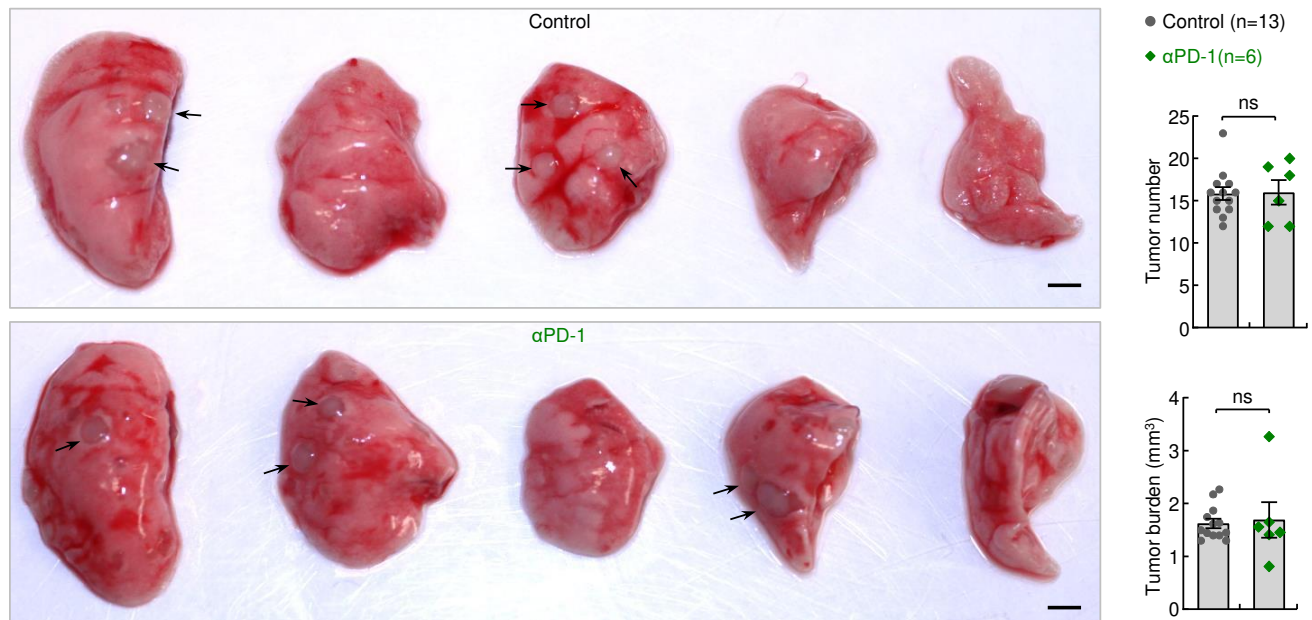

**Supplementary Fig. S3** Mouse lung cancers induced by urethane are largely resistant to PD-1 blockade therapy. Scale bar, 1 mm. Student's t test (two tailed, unpaired) was performed.

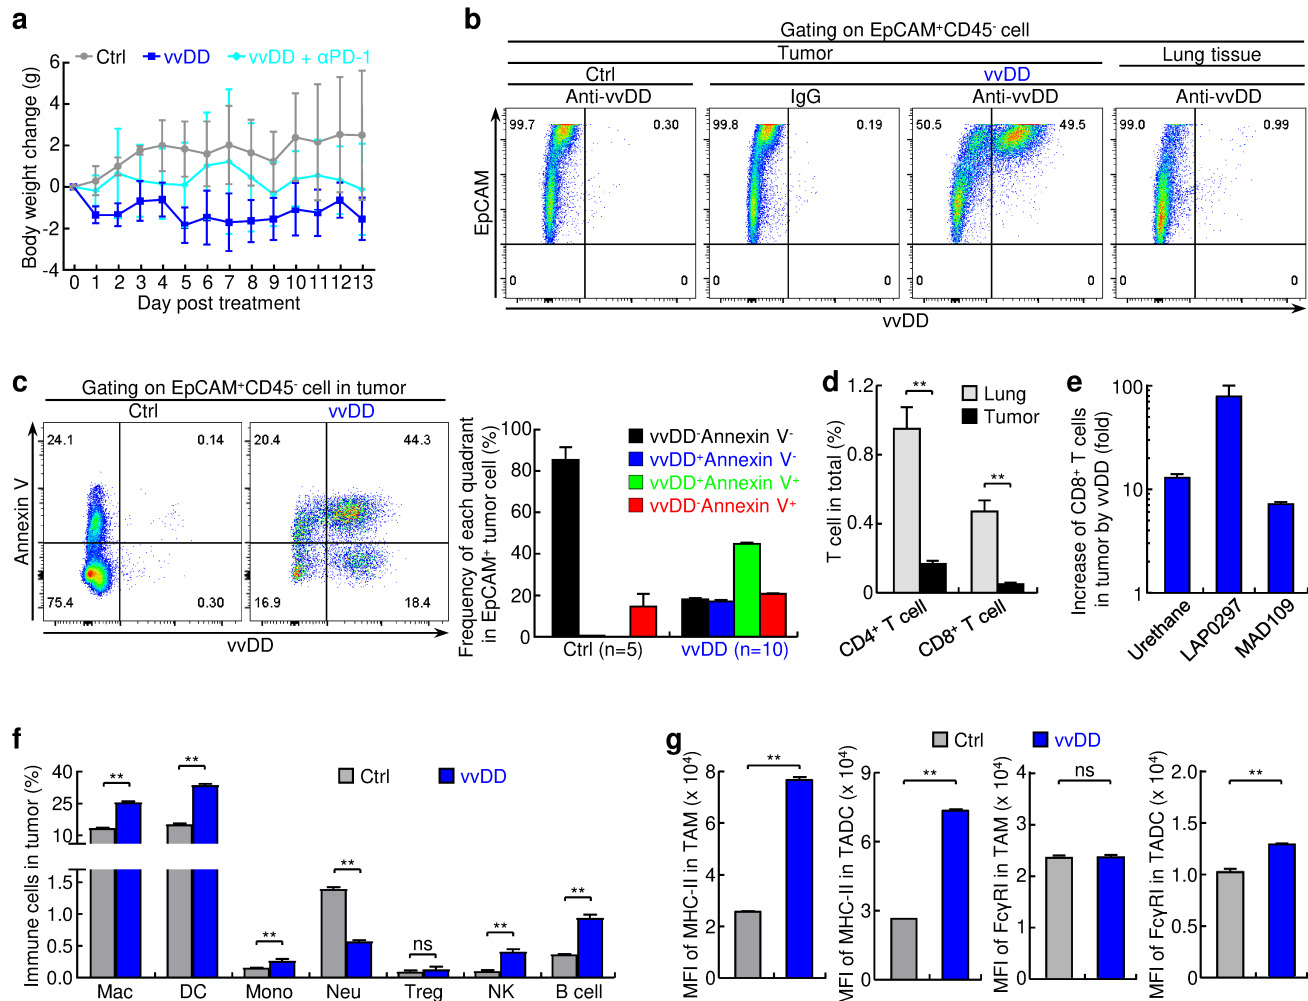

**Supplementary Fig. S4** vvDD treatment induces tumor cell apoptosis and anti-tumor immune changes in lung cancer without causing significant side effects. **a** Mouse weight monitoring showing no significant effect on body weight by vvDD alone or together with PD-1 antibody in urethane model (n = 3). **b** FACS assays showing tumor cell-specificity of vvDD after its systemic delivery in urethane model. **c** FACS assays showing increased apoptosis in vvDD<sup>+</sup> tumor cells in urethane model. Mice were sacrificed 2 days post systemic delivery of vvDD by tail vein intravenous injection in (**b**, **c**). Note, this apoptosis detection is based on annexin V binding to phosphatidylserine (PtdSer), a marker of apoptosis that is also a ligand of TIM-3, on the outer leaflet of the cellular membrane, and therefore can also be used to detect this TIM-3 ligand. **d** FACS assays showing decreased tumor-infiltrating lymphocytes (TILs) compared to normal lung tissues in urethane model (n = 6). **e** FACS assays showing increased tumor-infiltrating CD8<sup>+</sup> T cell in urethane-induced lung tumors (n = 3), syngeneic MAD109 tumors (n = 8) and syngeneic LAP0297 tumors (n = 5). **f** FACS assays showing the effects of vvDD treatment on immune cell populations within lung tumors in urethane model (n = 3). **g** FACS assays showing vvDD induction of MHCII and Fc $\gamma$ RI expression on tumor-associated macrophages (TAM) and dendritic cells (TADC) in urethane model (n = 3).

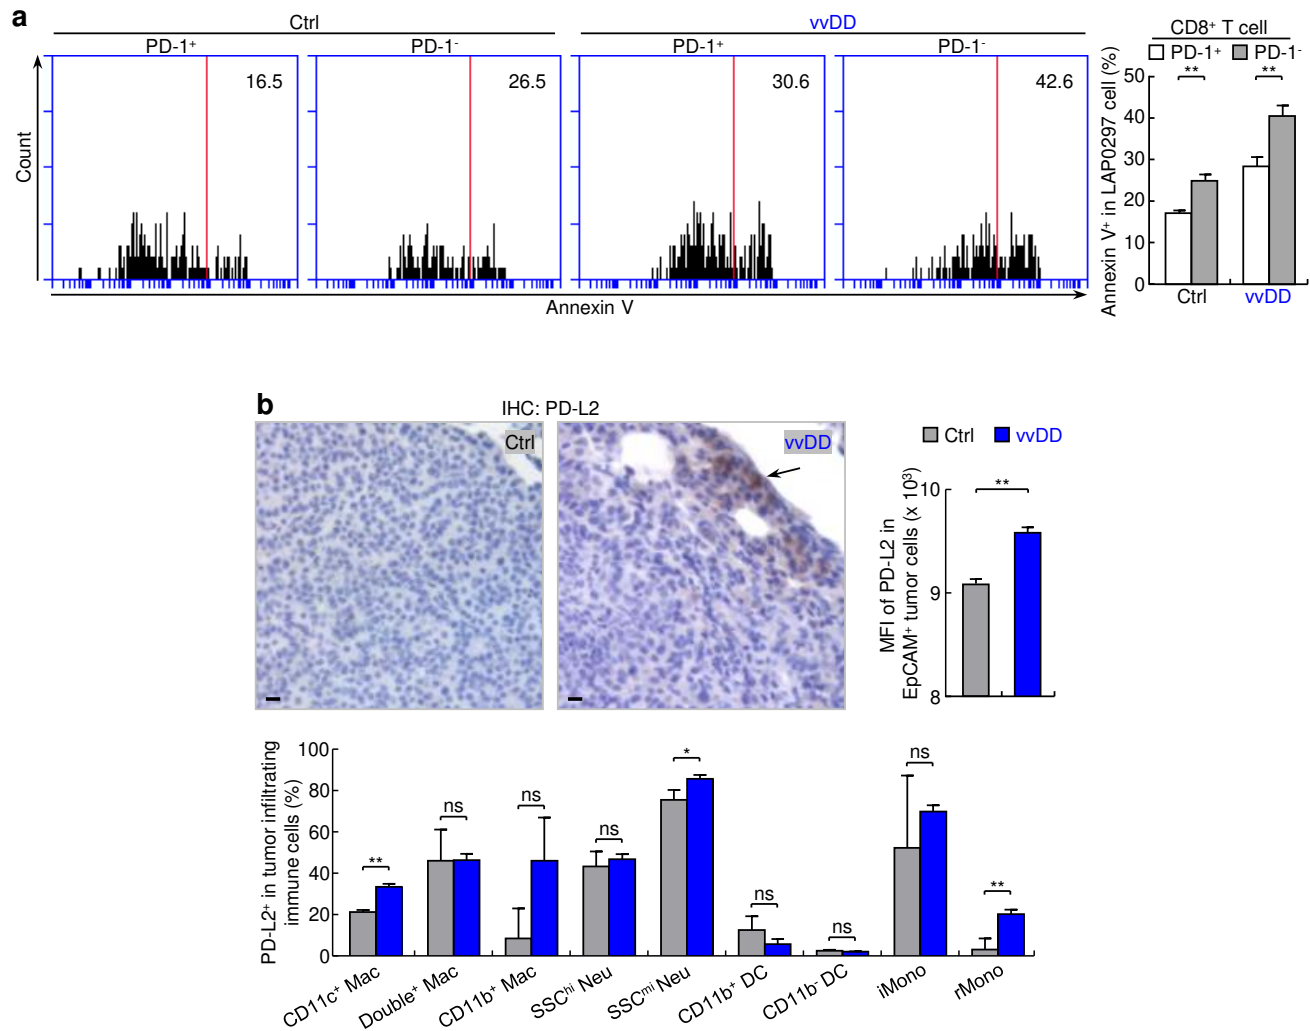

**Supplementary Fig. S5** Treatment with vvDD increases tumor killing ability of tumor-infiltrating CD8<sup>+</sup> T cells and induces PD-L2 expression on tumor cells and tumor-associated immune cells. **a** Co-culture assays showing a better antitumor cytotoxic ability of PD-1<sup>-</sup>CD8<sup>+</sup> T cells compared to PD-1<sup>+</sup>CD8<sup>+</sup> T cells and vvDD increase of this antitumor cytotoxicity in both PD-1<sup>-</sup>CD8<sup>+</sup> T cells and PD-1<sup>+</sup>CD8<sup>+</sup> T cells (n = 3). CD45<sup>+</sup>CD3<sup>+</sup>CD8<sup>+</sup> cells were sorted from s.c. LAP0297 tumor and co-cultured with LAP0297 cells at a ratio of 1:1 (CD8<sup>+</sup>:LAP0297). Four hours later, the apoptosis in tumor cells were detected by FACS. **b** IHC and FACS assays showing increased PD-L2 expression on tumor cells and tumor-associated immune cells by vvDD treatment in urethane model (n = 3; Mac: macrophage; Neu: neutrophil; SSC: side scatter; hi: high; mi: middle; DC: dendritic cell; iMono: inflammatory monocyte; rMono: resident monocyte). Scale bar: 20  $\mu$ m.

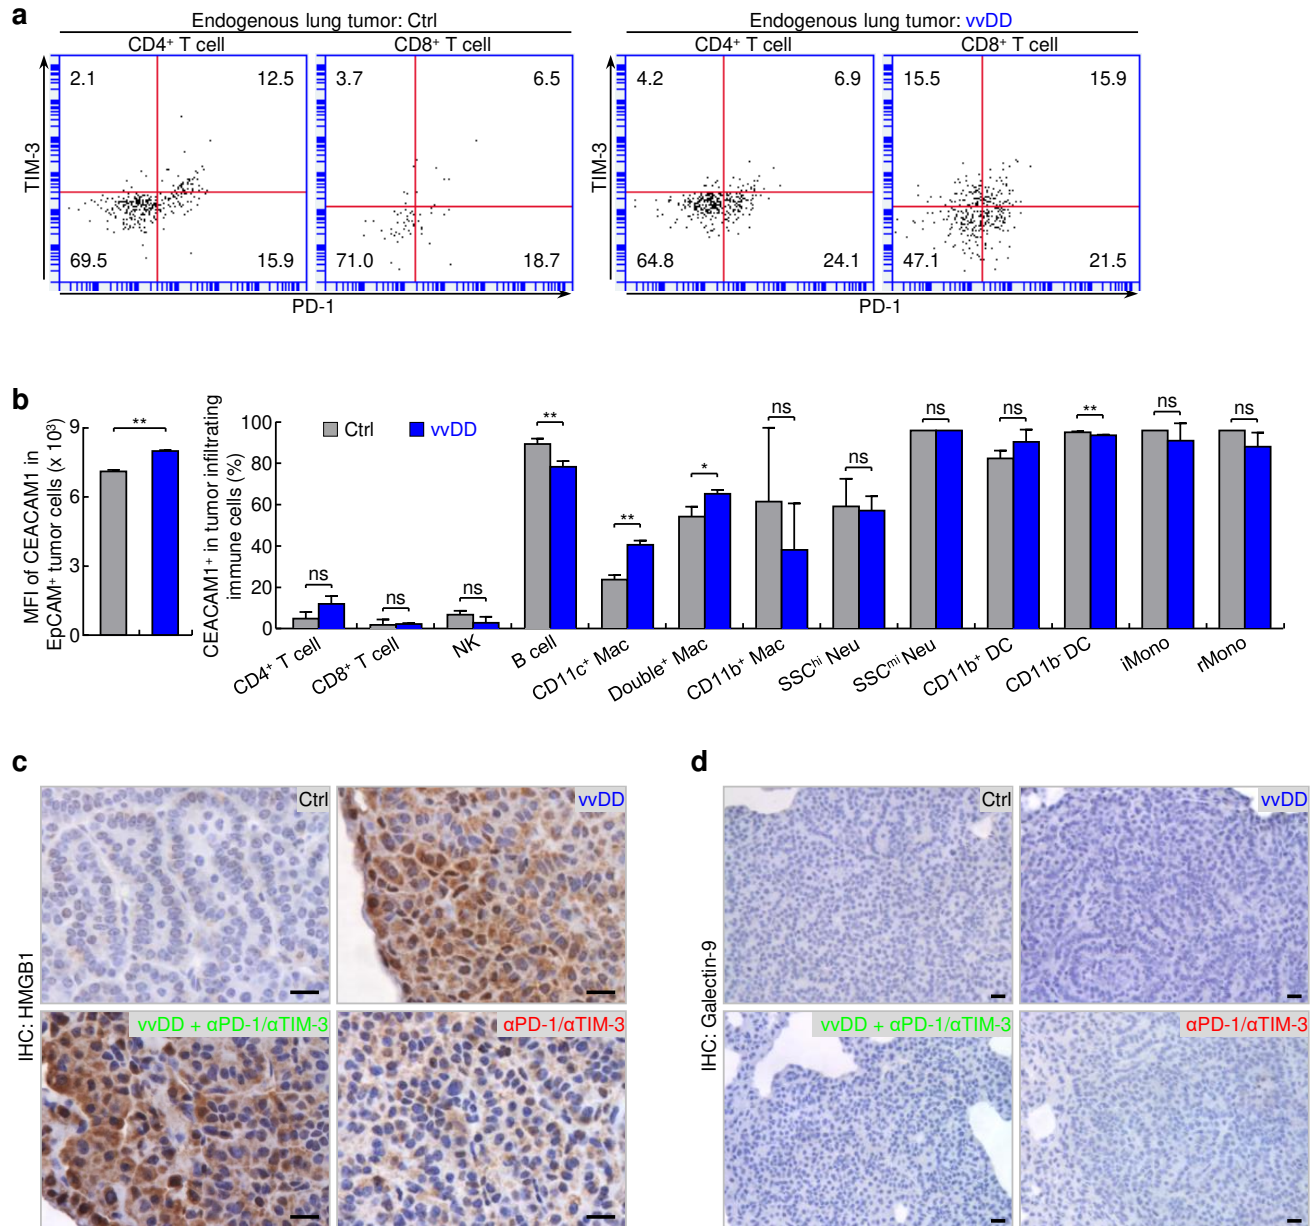

**Supplementary Fig. S6** vvDD treatment alone or together with PD-1/TIM-3 antibody increases TIM-3 expression on CD8<sup>+</sup> T cells and TIM-3 ligands expression in urethane-induced lung tumors. **a** FACS assays showing vvDD induction of PD-1 and TIM-3 expression on tumor-infiltrating CD8<sup>+</sup> T cells. **b** FACS assays showing the effects of vvDD treatment on TIM-3 ligand CEACAM1 in urethane-induced lung tumors and tumor-associated immune cells (n = 3; NK: natural killer cell; Mac: macrophage; Neu: neutrophil; SSC: side scatter; hi: high; mi: middle; DC: dendritic cell; iMono: inflammatory monocyte; rMono: resident Monocyte). **c-d** IHC assays showing the effects of vvDD and/or  $\alpha$ PD-1/ $\alpha$ TIM-3 treatment on TIM-3 ligands HMGB1 (**c**) and Galectin-9 (**d**) in urethane-induced lung tumors. Scale bar: 20  $\mu$ m.



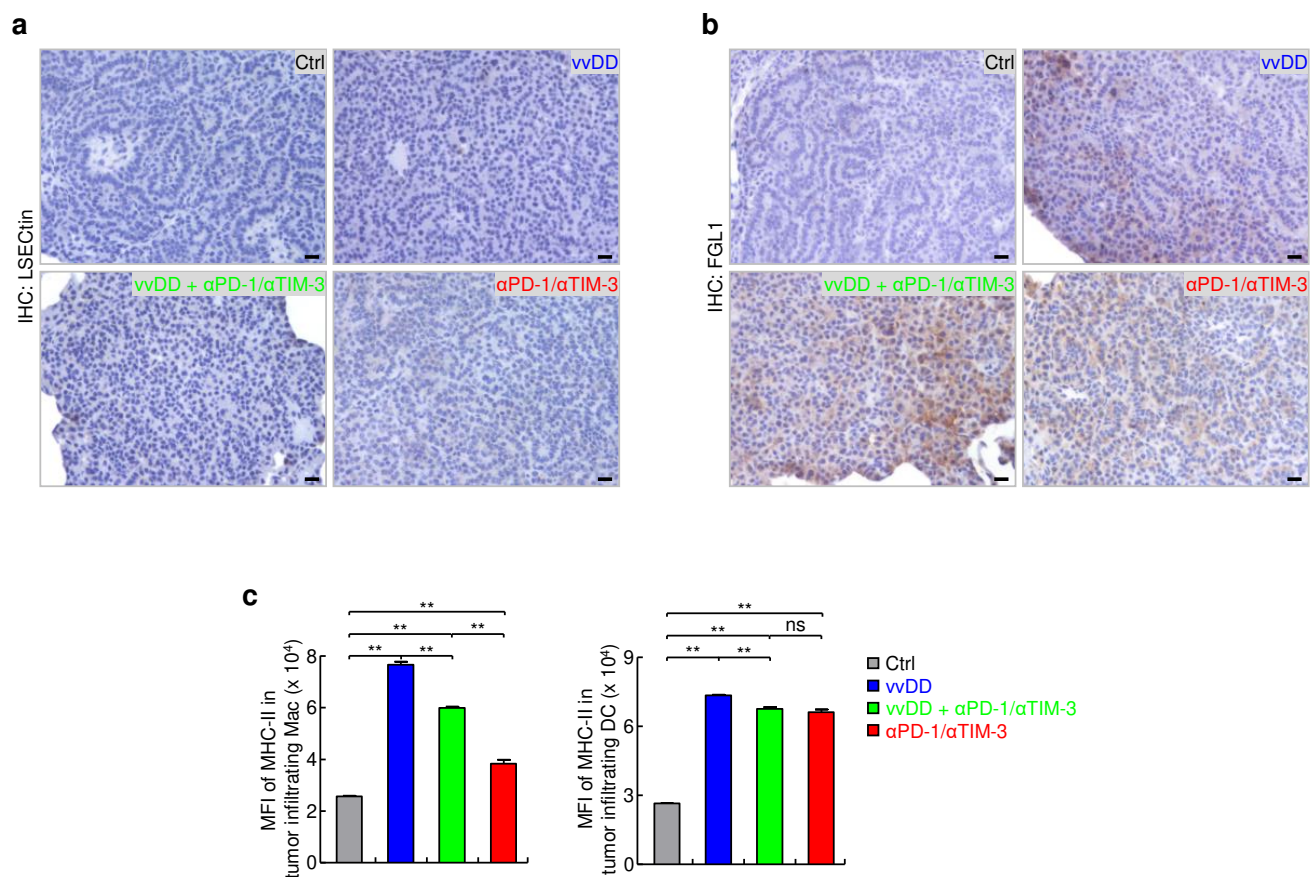

**Supplementary Fig. S7** Effects of vVDD and/or  $\alpha$ PD-1/ $\alpha$ TIM-3 treatment on LAG-3 ligands expression in urethane-induced lung tumors. **a-b** IHC assays showing the effects of vVDD and/or  $\alpha$ PD-1/ $\alpha$ TIM-3 treatment on the expression of LAG-3 ligands LSECtin (**a**) and FGL1 (**b**) in urethane-induced lung tumors. Scale bar: 20  $\mu$ m. **c** FACS assays showing induction of MHC-II expression on tumor-infiltrating macrophages and dendritic cells by vVDD and/or  $\alpha$ PD-1/ $\alpha$ TIM-3 treatment (n = 3).

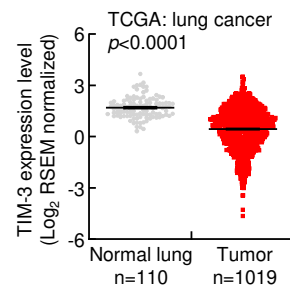

**Supplementary Fig. S8** TCGA data showing decreased TIM-3 expression in human lung cancer.



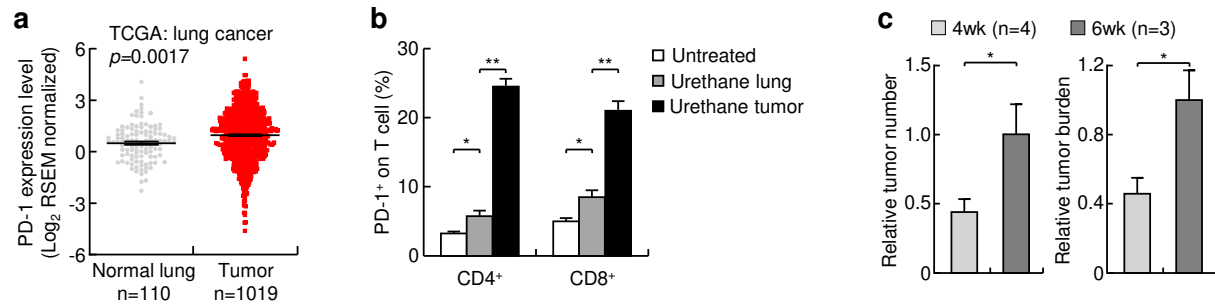

**Supplementary Fig. S9** Increased PD-1 expression in human lung cancer and additional characterization of urethane-induced murine lung tumor model. **a** TCGA data showing increased PD-1 expression in human lung cancer. **b** FACS assays showing induction of PD-1 expression on CD4<sup>+</sup> T cells and CD8<sup>+</sup> T cells by urethane in normal mouse lungs and lung tumors (n = 3). **c** The relative tumor number and burden at the initiation of the treatment compared to the endpoint of the studies in urethane model.

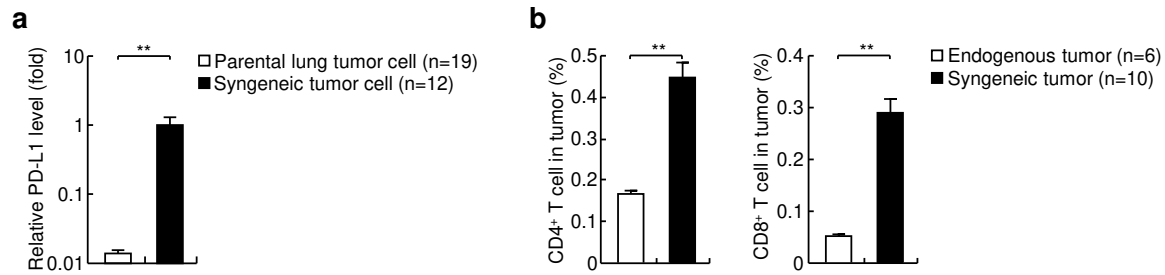

**Supplementary Fig. S10** Syngeneic lung tumors show high PD-L1 expression and T-cell infiltration. **a** qPCR analysis showing PD-L1 re-expression in syngeneic MAD109 lung tumors. **b** FACS assays showing significantly more tumor-infiltrating CD4<sup>+</sup> and CD8<sup>+</sup> T cells in syngeneic MAD109 lung tumors in comparison to endogenous lung tumor.

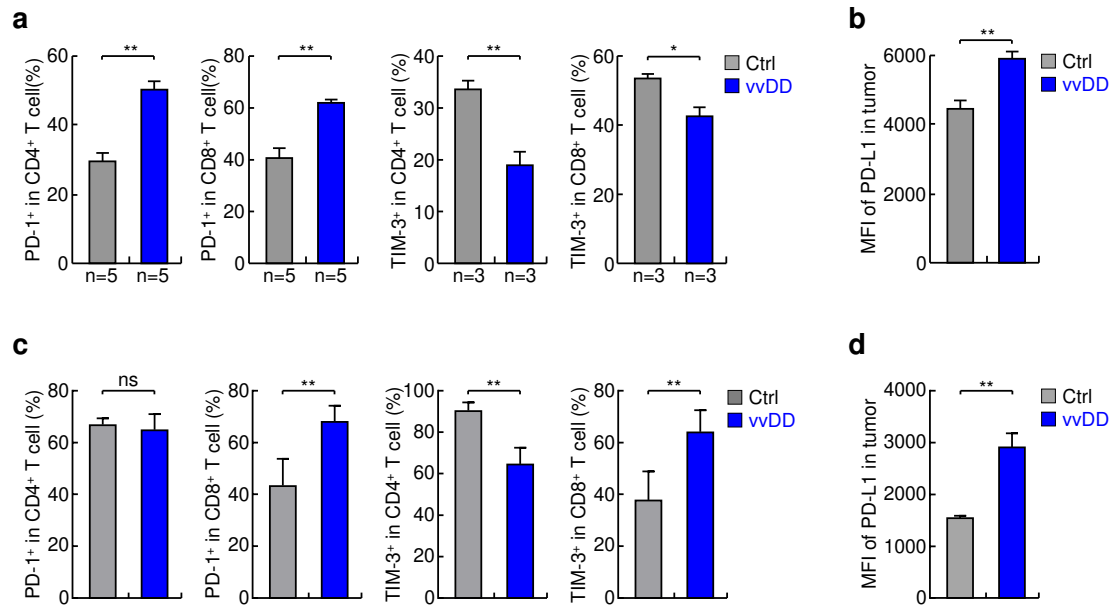

**Supplementary Fig. S11** vvDD shows complex effects on tumor-infiltrating CD4<sup>+</sup> and CD8<sup>+</sup> T cell PD-1 and TIM-3 expression in different syngeneic models. **a** FACS assays showing increased PD-1 but decreased TIM-3 expression on tumor-infiltrating CD4<sup>+</sup> and CD8<sup>+</sup> T cells by vvDD treatment in syngeneic MAD109 tumors. **b** FACS assays showing increased PD-L1 expression on syngeneic MAD109 tumors by vvDD treatment (n = 5). **c** FACS assays showing increased PD-1 and TIM-3 expression on tumor-infiltrating CD8<sup>+</sup> T cells but decreased TIM-3 expression on tumor-infiltrating CD4<sup>+</sup> T cells by vvDD treatment in syngeneic LAP0297 tumors (n = 5). **d** FACS assays showing increased PD-L1 expression on syngeneic LAP0297 tumors by vvDD treatment (n = 5).

**Table S1. Antibodies Used**

| <b>Antibody</b>                   | <b>Company</b>                              | <b>Cat. No.</b> | <b>Dose</b>              | <b>Usage</b> |
|-----------------------------------|---------------------------------------------|-----------------|--------------------------|--------------|
| Anti-Cleaved Caspase 3            | Cell Signaling Technology, Danvers, MA, USA | 9661            | 1 : 200                  | IHC          |
| Anti-PD-L1 (human)                | Cell Signaling Technology, Danvers, MA, USA | 13684           | 1 : 200                  | IHC          |
| Anti-PD-L1 (mouse)                | Cell Signaling Technology, Danvers, MA, USA | 64988           | 1 : 200                  | IHC          |
| Anti-PD-L2                        | Abcam, Cambridge, MA, USA                   | ab21107         | 1 : 50                   | IHC          |
| Anti-Galectin 9                   | Biologend, San Diego, CA, USA               | 137901          | 1 : 50                   | IHC          |
| Anti-LSECTin                      | Abcam, Cambridge, MA, USA                   | ab181196        | 1 : 200                  | IHC          |
| Anti-HMGB1                        | Invitrogen, Carlsbad, CA, USA               | PA1-16926       | 1 : 200                  | IHC          |
| Anti-FGL1                         | Invitrogen, Carlsbad, CA, USA               | PA5-30030       | 1 : 200                  | IHC          |
| Goat anti-rat IgG Biotinylated    | Vector Laboratories, Burlingame, CA, USA    | BA9401          | 1 : 100                  | IHC          |
| Goat anti-rabbit IgG Biotinylated | Dako, Carpinteria, CA, USA                  | E0432           | 1 : 200                  | IHC          |
| Anti-CD16/CD32                    | eBioscience, San Diego, CA, USA             | 14-0161-85      | 1.0 $\mu$ l per sample   | FACS         |
| Anti-CD45 Alexa Fluor 700         | Biologend, San Diego, CA, USA               | 103128          | 0.5 $\mu$ l per sample   | FACS         |
| Anti-CD45 FITC                    | Biologend, San Diego, CA, USA               | 103107          | 0.5 $\mu$ l per sample   | FACS         |
| Anti-PD-L1 SB780                  | eBioscience, San Diego, CA, USA             | 78-5982-82      | 0.3 $\mu$ l per sample   | FACS         |
| Anti-PD-L2 PerCP/Cy5.5            | Biologend, San Diego, CA, USA               | 107218          | 1.25 $\mu$ l per sample  | FACS         |
| Anti-CEACAM1 FITC                 | Biologend, San Diego, CA, USA               | 134518          | 0.5 $\mu$ l per sample   | FACS         |
| Anti-EpCAM PE                     | eBioscience, San Diego, CA, USA             | 12-5791-82      | 0.625 $\mu$ l per sample | FACS         |
| Anti-EpCAM BV421                  | Biologend, San Diego, CA, USA               | 118225          | 1.25 $\mu$ l per sample  | FACS         |
| Anti-Annexin V APC                | eBioscience, San Diego, CA, USA             | 17-8007-74      | 5 $\mu$ l per sample     | FACS         |
| PI                                | eBioscience, San Diego, CA, USA             | 00-6990-42      | 5 $\mu$ l per sample     | FACS         |
| Anti-CD3 PE                       | eBioscience, San Diego, CA, USA             | 12-0031-83      | 2.5 $\mu$ l per sample   | FACS         |
| Anti-CD3e APC780                  | eBioscience, San Diego, CA, USA             | 47-0031-82      | 5 $\mu$ l per sample     | FACS         |
| Anti-CD4 APC780                   | eBioscience, San Diego, CA, USA             | 47-0042-82      | 0.625 $\mu$ l per sample | FACS         |
| Anti-CD4 PE                       | eBioscience, San Diego, CA, USA             | 12-0041-83      | 0.625 $\mu$ l per sample | FACS         |
| Anti-CD4 PE-Cy7                   | eBioscience, San Diego, CA, USA             | 25-0042-82      | 1.25 $\mu$ l per sample  | FACS         |
| Anti-CD8a APC                     | eBioscience, San Diego, CA, USA             | 17-0081-83      | 0.625 $\mu$ l per sample | FACS         |
| Anti-IFN $\gamma$ FITC            | eBioscience, San Diego, CA, USA             | 11-7311-82      | 1 $\mu$ l per sample     | FACS         |
| Anti-GranzB FITC                  | eBioscience, San Diego, CA, USA             | 11-8898-82      | 0.25 $\mu$ l per sample  | FACS         |
| Anti-CD69 FITC                    | eBioscience, San Diego, CA, USA             | 11-0691-85      | 1 $\mu$ l per sample     | FACS         |
| Anti-CD44 PE-Cy7                  | eBioscience, San Diego, CA, USA             | 25-0441-81      | 0.625 $\mu$ l per sample | FACS         |
| Anti-PD-1 FITC                    | eBioscience, San Diego, CA, USA             | 11-9985-82      | 2 $\mu$ l per sample     | FACS         |
| Anti-TIM-3 PE                     | eBioscience, San Diego, CA, USA             | 12-5871-81      | 0.3 $\mu$ l per sample   | FACS         |
| Anti-LAG-3 FITC                   | eBioscience, San Diego, CA, USA             | 11-2231-82      | 2 $\mu$ l per sample     | FACS         |
| Anti-CD11b PE                     | eBioscience, San Diego, CA, USA             | 12-0112-82      | 0.625 $\mu$ l per sample | FACS         |
| Anti-CD11c APC780                 | eBioscience, San Diego, CA, USA             | 47-0114-82      | 2.5 $\mu$ l per sample   | FACS         |
| Anti-Ly6C BV650                   | Biologend, San Diego, CA, USA               | 128049          | 1.25 $\mu$ l per sample  | FACS         |
| Anti-Ly6G BV510                   | Biologend, San Diego, CA, USA               | 127633          | 2.5 $\mu$ l per sample   | FACS         |

|                  |                                 |            |                     |                            |
|------------------|---------------------------------|------------|---------------------|----------------------------|
| Anti-MerTK SB436 | eBioscience, San Diego, CA, USA | 62-5751-82 | 5 µl per sample     | FACS                       |
| Anti-CD64 PE-Cy7 | Biolegend, San Diego, CA, USA   | 139314     | 2.5 µl per sample   | FACS                       |
| Anti-MHCII APC   | eBioscience, San Diego, CA, USA | 17-5321-82 | 0.15 µl per sample  | FACS                       |
| Anti-NKp46 BV421 | Biolegend, San Diego, CA, USA   | 137612     | 2.5 µl per sample   | FACS                       |
| Anti-B220 BV510  | Biolegend, San Diego, CA, USA   | 103248     | 2.5 µl per sample   | FACS                       |
| Anti-CD25 PE     | eBioscience, San Diego, CA, USA | 12-0251-81 | 0.625 µl per sample | FACS                       |
| Anti-Foxp3 FITC  | eBioscience, San Diego, CA, USA | 11-5773-82 | 2 µl per sample     | FACS                       |
| Anti-PD-1        | BioXcell, West Lebanon, NH, USA | BE0273     | 200 µg/mouse/time   | <i>in vivo</i><br>blockade |
| Anti-TIM-3       | BioXcell, West Lebanon, NH, USA | BE0115     | 100 µg/mouse/time   | <i>in vivo</i><br>blockade |

**Table S2. Primers Used**

| Gene                | Species | Accession number | Forward (5' to 3')     | Reverse (5' to 3')    | Usage  |
|---------------------|---------|------------------|------------------------|-----------------------|--------|
| <i>gapdh</i>        | human   | NM_002046.3      | CCGAGCCACATCGCTCAGACAC | GTGACCAGGCGCCAATACGAC | RT-PCR |
| <i>cd274 (pd-1)</i> | human   | NM_014143.3      | TGGCATTGCTGAACGCATTT   | AGTGCAGCCAGGTCTAATTGT | RT-PCR |
| <i>gapdh</i>        | mouse   | NM_008084.2      | AGTGCCAGCCTCGTCCCGTA   | CAGGCGCCAATACGGCCAA   | RT-PCR |
| <i>cd274 (pd-1)</i> | mouse   | NM_021893.3      | CCTGCTGTCACTTGCTACGG   | CACTAACGCAAGCAGGTCCA  | RT-PCR |
